# Supplementary material
Source: publisher figshare collection journal article supplement (https://diabetesjournals.figshare.com/articles/dataset/_/25483273)

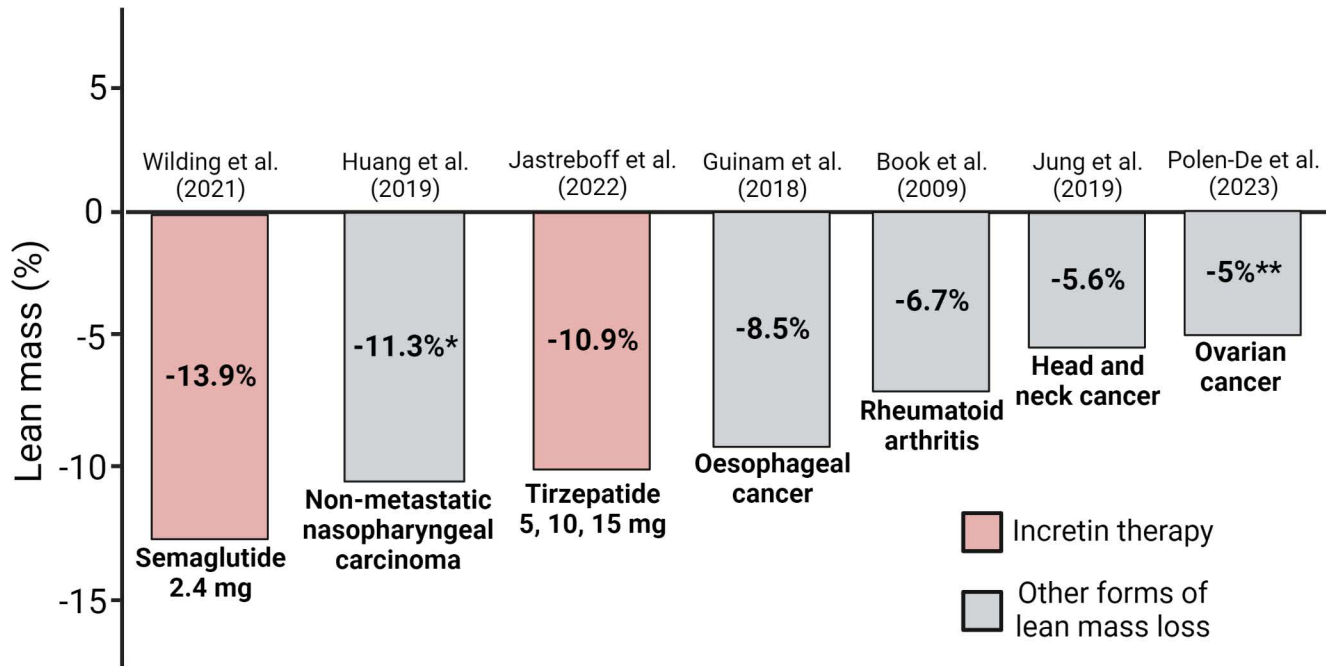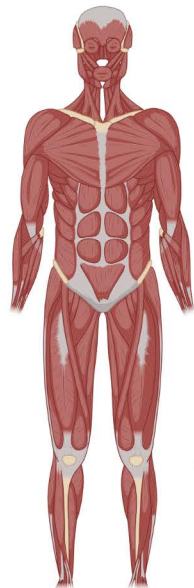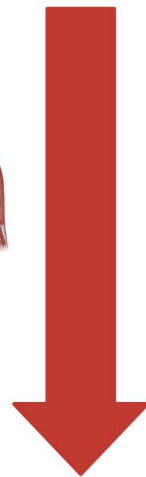

Supplement: Supplementary file 1 [file 1]

**Modality**

**Age**

**Sex**

0

0.5

1.0

1.5

2.0

2.5

3.0

Effect of exercise training on lean mass (kg)

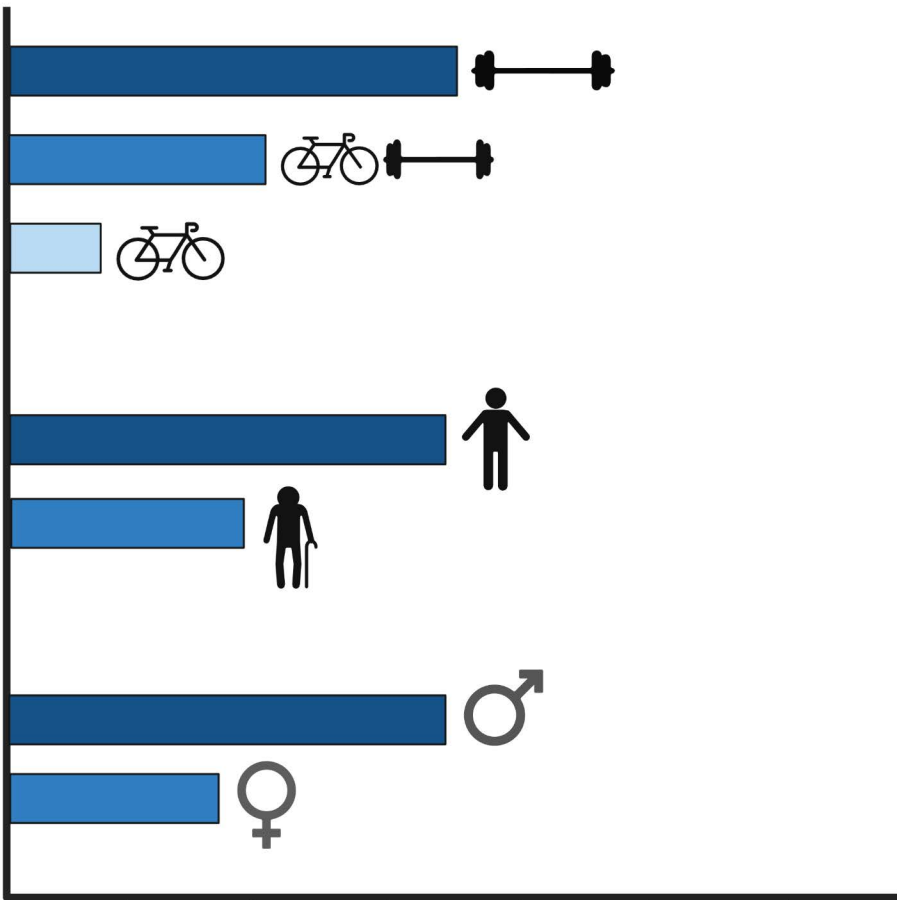

Supplement: Supplementary file 2 [file 1]
